# Supplementary material
Source: HighWire-hosted journal article supplement (https://bmjopenquality.bmj.com/content/12/2/e002134)
Supplement: inline-supplementary-material-1 [file inline-supplementary-material-1.pdf]

## APPENDICES

### Appendix 1

The multifeild search query was: ((( (TITLE-ABS-KEY ( quality AND improvement\* ) ) OR ( TITLE-ABS-KEY ( quality AND control\* ) ) OR ( TITLE-ABS-KEY ( quality AND assurance\* ) ) OR ( TITLE-ABS-KEY ( policy\* ) ) OR ( TITLE-ABS-KEY ( program AND evaluation\* ) ) ) OR ( ( TITLE-ABS-KEY ( system AND improvement\* ) ) OR ( TITLE-ABS-KEY ( influencing AND factors\* ) ) OR ( TITLE-ABS-KEY ( barriers\* ) ) OR ( TITLE-ABS-KEY ( facilitators\* ) ) OR ( TITLE-ABS-KEY ( improvement AND factors\* ) ) ) ) AND ( ( TITLE-ABS-KEY ( surveys\* AND questionnaires\* ) ) OR ( TITLE-ABS-KEY ( behavior\* ) ) OR ( TITLE-ABS-KEY ( self AND concept\* ) ) OR ( TITLE-ABS-KEY ( self AND concept\* ) ) OR ( TITLE-ABS-KEY ( work AND experience\* ) ) OR ( TITLE-ABS-KEY ( personal AND experience\* ) ) OR ( TITLE-ABS-KEY ( experience\* ) ) OR ( TITLE-ABS-KEY ( health AND personnel AND attitude\* ) ) ) AND ( ( TITLE-ABS-KEY ( safety AND incidents\* ) ) OR ( ( TITLE-ABS-KEY ( near AND miss\* ) ) OR ( TITLE-ABS-KEY ( medication AND errors\* ) ) OR ( TITLE-ABS-KEY ( medical AND errors\* ) ) OR ( TITLE-ABS-KEY ( sentinel AND surveillance\* ) ) ) ) AND ( ( TITLE-ABS-KEY ( incident AND reporting AND system\* ) ) OR ( TITLE-ABS-KEY ( patient AND safety AND learning AND system\* ) ) OR ( TITLE-ABS-KEY ( prevention AND strategies\* ) ) OR ( ( TITLE-ABS-KEY ( safety AND management\* ) ) OR ( TITLE-ABS-KEY ( risk AND management\* ) ) OR ( TITLE-ABS-KEY ( patient AND safety\* ) ) OR ( TITLE-ABS-KEY ( adverse AND drug AND reaction AND reporting AND systems\* ) ) ) ) ) AND ( TITLE-ABS-KEY ( hospital\* ) ).

## Appendix 2

### JBI QARI Data Extraction Tool for Qualitative Research

Reviewer \_\_\_\_\_ Date \_\_\_\_\_

Author \_\_\_\_\_ Year \_\_\_\_\_

Journal \_\_\_\_\_ Record Number \_\_\_\_\_

#### Study Description

Methodology|

\_\_\_\_\_

Method

\_\_\_\_\_

Phenomena of interest

\_\_\_\_\_

Setting

\_\_\_\_\_

Geographical

\_\_\_\_\_

Cultural

\_\_\_\_\_

Participants

\_\_\_\_\_

Data analysis

\_\_\_\_\_

Authors conclusions

\_\_\_\_\_

Comments

\_\_\_\_\_

Complete

Yes

No

Copyright © The Joanna Briggs Institute 2014

| Findings | Illustration form Publication (page number) | Evidence    |          |             |
|----------|---------------------------------------------|-------------|----------|-------------|
|          |                                             | Unequivocal | Credible | Unsupported |
|          |                                             |             |          |             |
|          |                                             |             |          |             |
|          |                                             |             |          |             |
|          |                                             |             |          |             |
|          |                                             |             |          |             |
|          |                                             |             |          |             |
|          |                                             |             |          |             |
|          |                                             |             |          |             |
|          |                                             |             |          |             |
|          |                                             |             |          |             |
|          |                                             |             |          |             |
|          |                                             |             |          |             |
|          |                                             |             |          |             |

Extraction of findings complete Yes No 

Copyright © The Joanna Briggs Institute 2014

### Appendix 3: CASP-Qualitative-Checklist

Paper for appraisal and reference:

Section A: Are the results valid?

1. Was there a clear statement of the aims of the research?

Yes   
 Can't Tell   
 No

HINT: Consider

- what was the goal of the research
- why it was thought important
- its relevance

Comments:

2. Is a qualitative methodology appropriate?

Yes   
 Can't Tell   
 No

HINT: Consider

- if the research seeks to interpret or illuminate the actions and/or subjective experiences of research participants
- is qualitative research the right methodology for addressing the research goal

Comments:

Is it worth continuing?

3. Was the research design appropriate to address the aims of the research?

Yes   
 Can't Tell   
 No

HINT: Consider

- if the researcher has justified the research design (e.g. have they discussed how they decided which method to use)

Comments:

4. Was the recruitment strategy appropriate to the aims of the research?

Yes   
 Can't Tell   
 No

HINT: Consider

- if the researcher has explained how the participants were selected
- if they explained why the participants they selected were the most appropriate to provide access to the type of knowledge sought by the study
- if there are any discussions around recruitment (e.g. why some people chose not to take part)

Comments:

5. Was the data collected in a way that addressed the research issue?

Yes   
 Can't Tell   
 No

HINT: Consider

- if the setting for the data collection was justified
- if it is clear how data were collected (e.g. focus group, semi-structured interview etc.)
- if the researcher has justified the methods chosen
- if the researcher has made the methods explicit (e.g. for interview method, is there an indication of how interviews are conducted, or did they use a topic guide)
- if methods were modified during the study, if so, has the researcher explained how and why
- if the form of data is clear (e.g. tape recordings, video material, notes etc.)
  - if the researcher has discussed saturation of data

Comments:

6. Has the relationship between researcher and participants been adequately considered?

|            |                          |
|------------|--------------------------|
| Yes        | <input type="checkbox"/> |
| Can't Tell | <input type="checkbox"/> |
| No         | <input type="checkbox"/> |

- HINT: Consider**
- If the researcher critically examined their own role, potential bias and influence during (a) formulation of the research questions (b) data collection, including sample recruitment and choice of location
  - How the researcher responded to events during the study and whether they considered the implications of any changes in the research design

Comments:

Section 8: What are the results?

7. Have ethical issues been taken into consideration?

|            |                          |
|------------|--------------------------|
| Yes        | <input type="checkbox"/> |
| Can't Tell | <input type="checkbox"/> |
| No         | <input type="checkbox"/> |

- HINT: Consider**
- If there are sufficient details of how the research was explained to participants for the reader to assess whether ethical standards were maintained
  - If the researcher has discussed issues raised by the study (e.g. issues around informed consent or confidentiality or how they have handled the effects of the study on the participants during and after the study)
  - If approval has been sought from the ethics committee

Comments:

8. Was the data analysis sufficiently rigorous?

Yes

Can't Tell

No

- HINT: Consider
- if there is an in-depth description of the analysis process
  - if thematic analysis is used, if so, is it clear how the categories/themes were derived from the data
  - Whether the researcher explains how the data presented were selected from the original sample to demonstrate the analysis process
  - if sufficient data are presented to support the findings
    - To what extent contradictory data are taken into account
  - Whether the researcher critically examined their own role, potential bias and influence during analysis and selection of data for presentation

Comments:

9. Is there a clear statement of findings?

Yes

Can't Tell

No

- HINT: Consider whether
- if the findings are explicit
  - if there is adequate discussion of the evidence both for and against the researcher's arguments
  - if the researcher has discussed the credibility of their findings (e.g. triangulation, respondent validation, more than one analyst)
  - if the findings are discussed in relation to the original research question

Comments:

Section C: Will the results help locally?

10. How valuable is the research?

- HINT: Consider
- if the researcher discusses the contribution the study makes to existing knowledge or understanding (e.g. do they consider the findings in relation to current practice or policy, or relevant research-based literature)
  - if they identify new areas where research is necessary
  - if the researchers have discussed whether or how the findings can be transferred to other populations or considered other ways the research may be used

Comments:
